# Supplementary material for: Connectivity-Based Brain Network Supports Restricted and Repetitive Behaviors in Autism Spectrum Disorder Across Development
Source: PubMed Central journal article supplement (PMC8989843; doi:10.3389/fpsyt.2022.874090), 2022-03-25
Supplement: Data_Sheet_1.pdf [file Data_Sheet_1.pdf]

# Connectivity-based brain network supports restricted and repetitive behaviors in autism spectrum disorder across development

Anyi Zhang,<sup>1</sup> Lin Liu,<sup>1,2</sup> Suhua Chang,<sup>1</sup> Le Shi,<sup>1</sup> Peng Li,<sup>1</sup> Jie Shi,<sup>2</sup> Lin Lu,<sup>1,3,\*</sup> Yanping Bao,<sup>2,4,\*</sup> Jiajia Liu,<sup>5,\*</sup>

## MATERIALS AND METHODS

### Measures

*ADOS and ADI-R* Autism Diagnose Observation Schedule (ADOS) and Autism Diagnostic Interview-Revised (ADI-R) are widely used measurements, and recently accepted as the “gold standard” for diagnosing ASD (Schutte et al., 2018). These two measurements provide items assessing social function and restricted/repetitive behaviors in ASD. We extracted the subscales evaluating restricted/repetitive behaviors for every participants, and compared among different age-group.

### Brain imaging processing

*Scan parameters for each center* The final sample included 147 ASD patients from nine research centers: BNI, IP, KKI, KUL, NYU, SDSU, TCD, and UCD. The detailed scan parameters were presented in the Table S1.

## Results

As shown in **Table S2**, the RRBIs evaluated by ADOS significantly decreased after the childhood ( $p = 0.017$ ), while the differences among younger adolescents, elder adolescents and adults were not profound, which was mostly consistent with the result using RBSR-6. However, the RRBIs assessed by ADI-R among four age groups were not significantly differ from each other. This result might be explained by the missing data on ADI-R in about half of the participants.

**Table S1. The scan parameters of resting state fMRI at each center.**

| Data collection center | TR (ms) | TE (ms) | FOV (mm) | FA (°) | Resolution (mm <sup>3</sup> ) |
|------------------------|---------|---------|----------|--------|-------------------------------|
| BNI                    | 3000    | 25      | 240      | 80     | 3.75×3.75×4.00                |
| IP                     | 2700    | 45      | 230      | 90     | 3.60×3.70×4.00                |
| KKI                    | 2500    | 30      | 288      | 60     | 3.00×3.00×3.00                |
| KUL                    | 2500    | 30      | 200      | 90     | 1.56×1.56×3.10                |
| NYU_1                  | 2000    | 15      | 240      | 90     | 3.00×3.00×4.00                |
| NYU_2                  | 2000    | 30      | 240      | 82     | 3.00×3.00×3.00                |
| SDSU                   | 2000    | 30      | 220      | 90     | 3.44×3.44×3.40                |
| TCD                    | 2000    | 27      | 240      | 90     | 3.00×3.00×3.20                |
| UCD                    | 2000    | 24      | 224      | 90     | 3.50×3.50×3.50                |

Note: TR, repetition time; TE, echo time; FOV: field of view; FA, flip angle; BNI, Barber National Institute; IP, Institut Pasteur; KKI, Kennedy Krieger Institute; KUL, Katholieke Universiteit Leuven; NYU, New York University; SDSU, San Diego State University; TCD, Trinity College Dublin; UCD, University College Dublin.

**Table S2. Comparison of RRBIs evaluated by ADI-R and ADOS in different age groups ( $n = 147$ ).**

| Questionnaire | (1) Children<br>( $n = 31$ ) | (2) Younger<br>adolescents<br>( $n = 52$ ) | (3) Older<br>adolescents<br>( $n = 33$ ) | (4) Adults<br>( $n = 31$ ) | $H$   | $p$   | $p$ in <i>post hoc</i> test |         |         |         |         |         |
|---------------|------------------------------|--------------------------------------------|------------------------------------------|----------------------------|-------|-------|-----------------------------|---------|---------|---------|---------|---------|
|               |                              |                                            |                                          |                            |       |       | (2)-(1)                     | (3)-(1) | (4)-(1) | (3)-(2) | (4)-(2) | (4)-(3) |
| ADI-R         | 6.00, 2.00                   | 5.00, 3.00                                 | 5.00, 5.00                               | NA                         | 4.31  | 0.230 | NA                          | NA      | NA      | NA      | NA      | NA      |
| ADOS          | 3.00, 3.00                   | 2.50, 3.00                                 | 2.00, 3.00                               | 2.00, 2.00                 | 10.14 | 0.017 | 0.057                       | 0.029   | 0.002   | 0.607   | 0.117   | 0.334   |

RRBIs, restricted and repetitive behaviors and interests; ADI-R, Autism Diagnostic Interview-Revised; ADOS, Autism Diagnose Observation Schedule; NA, not appliable. *Post hoc* tests were conducted to explore differences between age groups. In the *post hoc* test, (1) refers to children, (2) refers to younger adolescents, (3) refers to older adolescents, and (4) refers to adults.

### References

Schutte, C., Richardson, W., Devlin, M., Hill, J., Ghossainy, M., and Hewitson, L. (2018). The relationship between social affect and restricted and repetitive behaviors measured on the ADOS-2 and maternal stress. *J Autism Dev Disord* 48(3), 751-758. doi: 10.1007/s10803-017-3453-1.
